# Supplementary material
Source: PubMed Central journal article supplement (PMC6441630)
Supplement: NIHMS1517447-supplement-1.pdf [file NIHMS1517447-supplement-1.pdf]

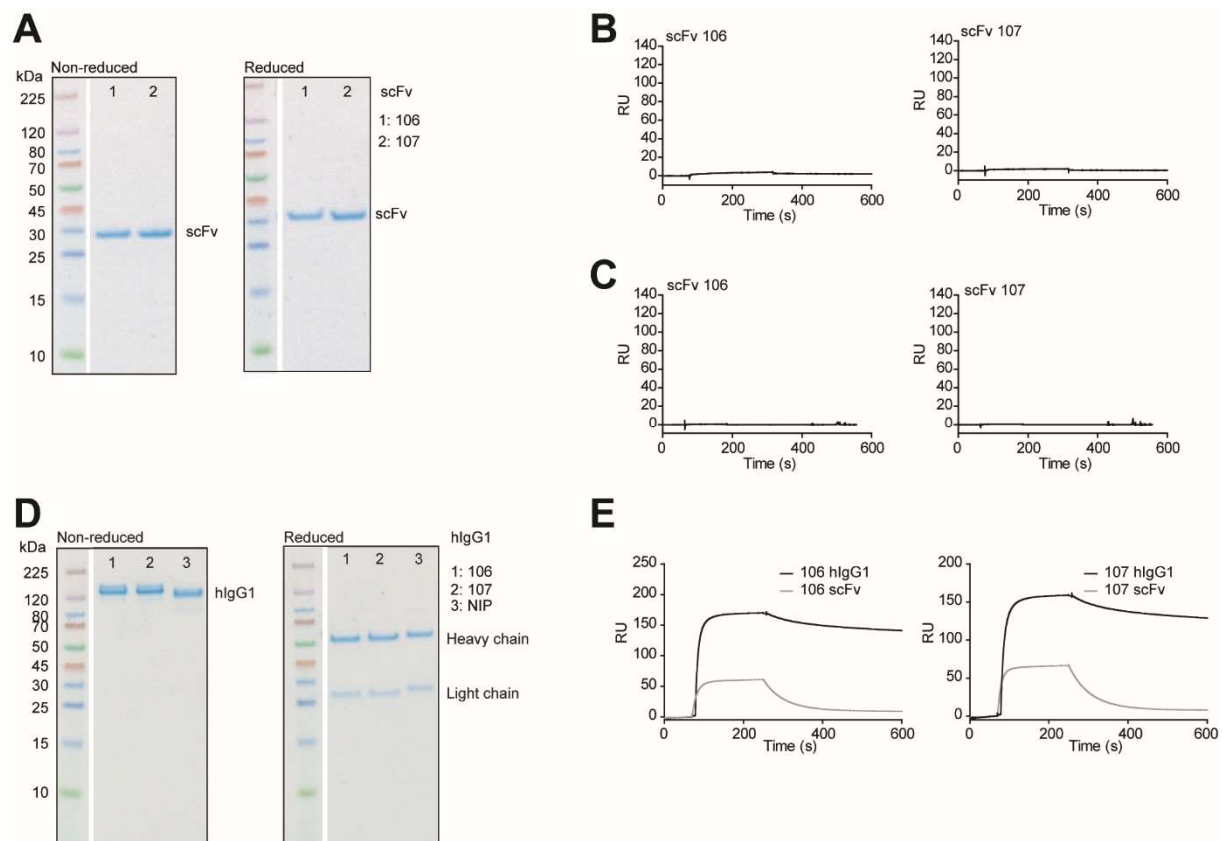

**Supplementary Figure 1.** Expression and binding of scFv clones and hlgG1 mAbs. (A-C) The lead scFv clones were expressed and purified from *E. coli* periplasmic fractions. (A) SDS-PAGE gel analysis of the scFv clones that specifically bound HLA-DQ2.5:DQ2.5-glia- $\alpha$ 1a. Gels were run after purification by IMAC and size exclusion chromatography under non-reducing and reducing conditions. scFv size of approx. 30 kDa is indicated. (B,C) Representative SPR sensorgrams of the scFv clones for binding to (B) HLA-DQ2.5:CLIP2 ( $n=2$ ) and (C) HLA-DQ2.5:DQ2.5-glia- $\alpha$ 2 ( $n=2$ ). (D,E) The lead scFv clones and isotype control scFv (anti-NIP) were reformatted to hlgG1 mAbs, expressed by transient transfection of HEK293E cells and purified from supernatants. (D) SDS-PAGE gel of purified hlgG1 mAbs run under non-reducing and reducing conditions. Appropriate-size bands at about 150 kDa for full-length hlgG1 and bands at 50 kDa and 23 kDa (reduced heavy and light chains, respectively) are indicated. (E) SPR sensorgrams of hlgG1 mAbs and the corresponding scFv clones binding to HLA-DQ2.5:DQ2.5-glia- $\alpha$ 1a to validate gain in functional affinity after reformating to full-length hlgG1 mAbs.

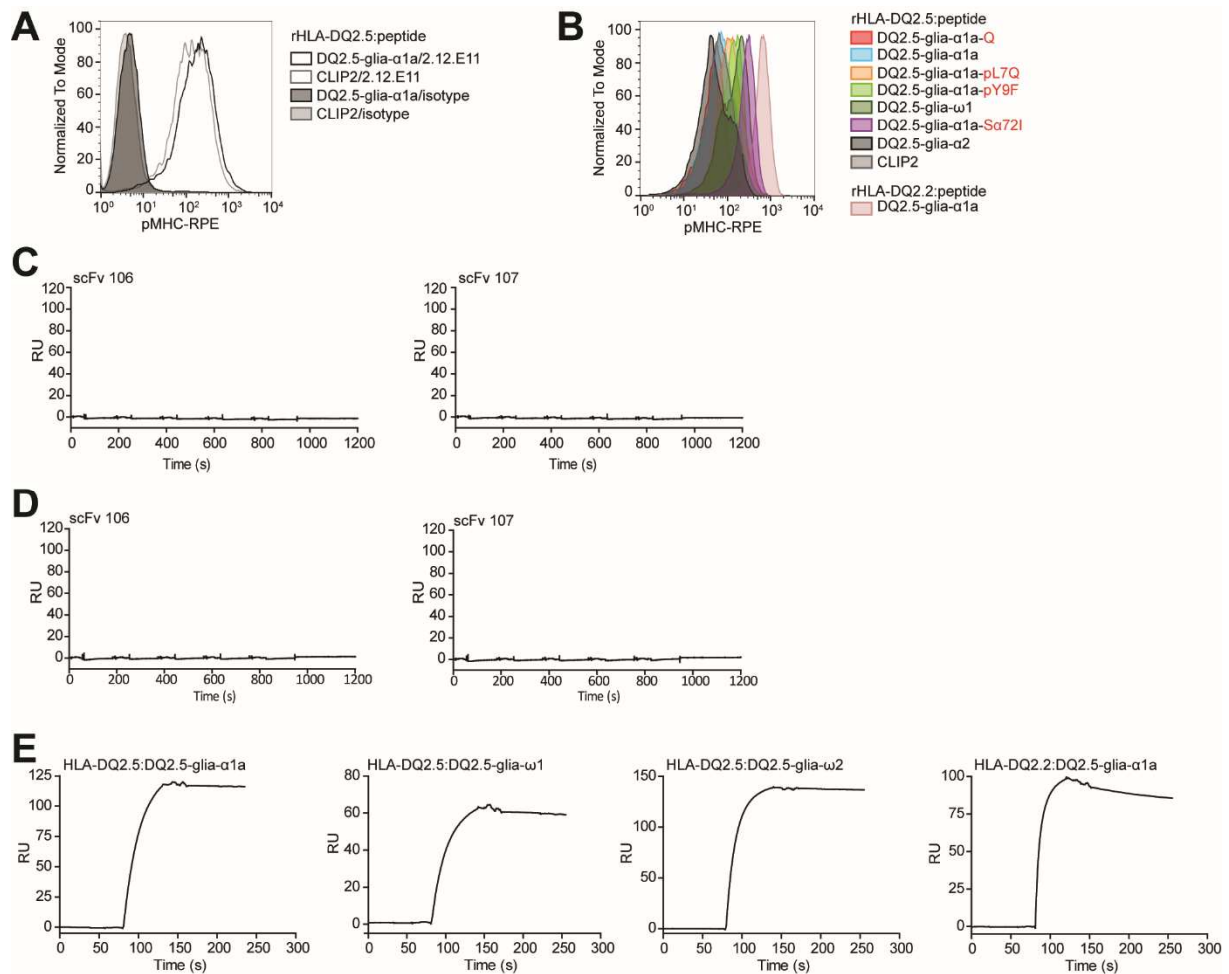

**Supplementary Figure 2.** Fine-specificity assessment. (A) Flow cytometric analysis of A20 B cells transduced to express HLA-DQ2.5 with covalently bound DQ2.5-glia- $\alpha$ 1a or CLIP2 peptides stained with biotinylated mAb 2.12.E11 or isotype control mAb, followed by RPE-conjugated streptavidin (n=2). (B) Flow cytometric assessment of the pMHC expression level of the panel of A20 B cells transduced with either HLA-DQ2.5 or HLA-DQ2.2 with covalently bound peptide. Q indicates native (glutamine) DQ2.5-glia- $\alpha$ 1a epitope. Unless specified, all epitopes are in the deamidated form. All cells were stained with biotinylated mAb 2.12.E11 followed by streptavidin-RPE (n=2). (C,D) Representative SPR sensorgrams showing binding to (C) HLA-DQ2.5: DQ2.5-glia- $\omega$ 1 (n=2) and (D) HLA-DQ2.2: DQ2.5-glia- $\alpha$ 1a (n=1) after capture of pMHC on sensor chips and injection of scFv clones as indicated. (E) SPR binding analysis of the HLA-DQ conformational-specific mAb SPV-L3 to evaluate the conformational integrity of HLA-DQ2.5: DQ2.5-glia- $\alpha$ 1a, HLA-DQ2.5: DQ2.5-glia- $\omega$ 1, HLA-DQ2.5: DQ2.5-glia- $\omega$ 2, and HLA-DQ2.2: DQ2.5-glia- $\alpha$ 1a as indicated after scFv binding experiments.

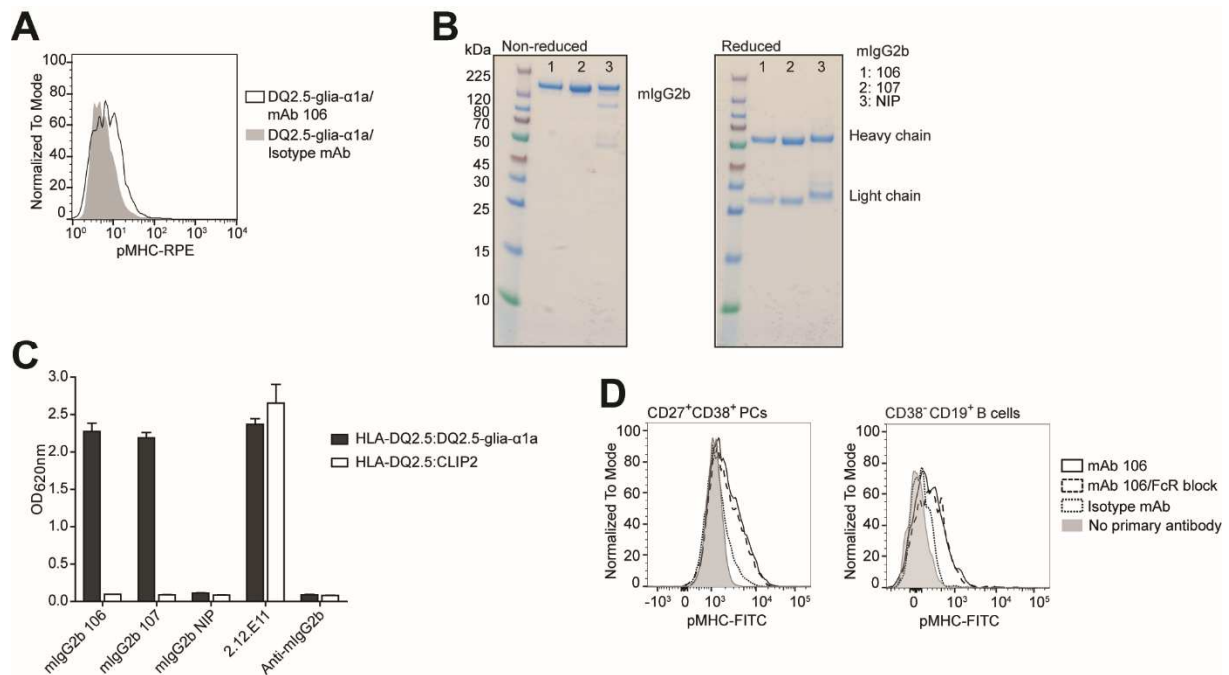

**Supplementary Figure 3.** Construction of mlgG2b mAbs and flow cytometric analysis of peptide-loaded cells and single-cell suspensions from celiac patient biopsies. (A) Monocyte-derived DCs were loaded with peptide and stained with hlgG1 mAb 106 or isotype control mAb before flow cytometric analysis (n=1). (B) SDS-PAGE gels of the mAbs 106 and 107 and isotype control mAb after reformatting to mlgG2b and purification from supernatants of transfected HEK293E cells. Full-length mlgG2b of approx. 150 kDa run under non-reducing conditions and separated heavy and light chains at approx. 50 kDa and 23 kDa run under reducing conditions are indicated. (C) Representative ELISA showing retained specificity of mlgG2b mAbs 106 and 107 after reformatting (n=2). mAb 2.12.E11 was included to control pMHC capture levels. (D) The figure is based on Fig. 3A showing detection of HLA-DQ2.5:DQ2.5-glia- $\alpha$ 1a using mAb 106 with or without use of FcR block. Single-cell suspensions of intestinal biopsies from 3 patients all being HLA-DQ2.5<sup>+</sup> with Marsh 3B/C were run in parallel.

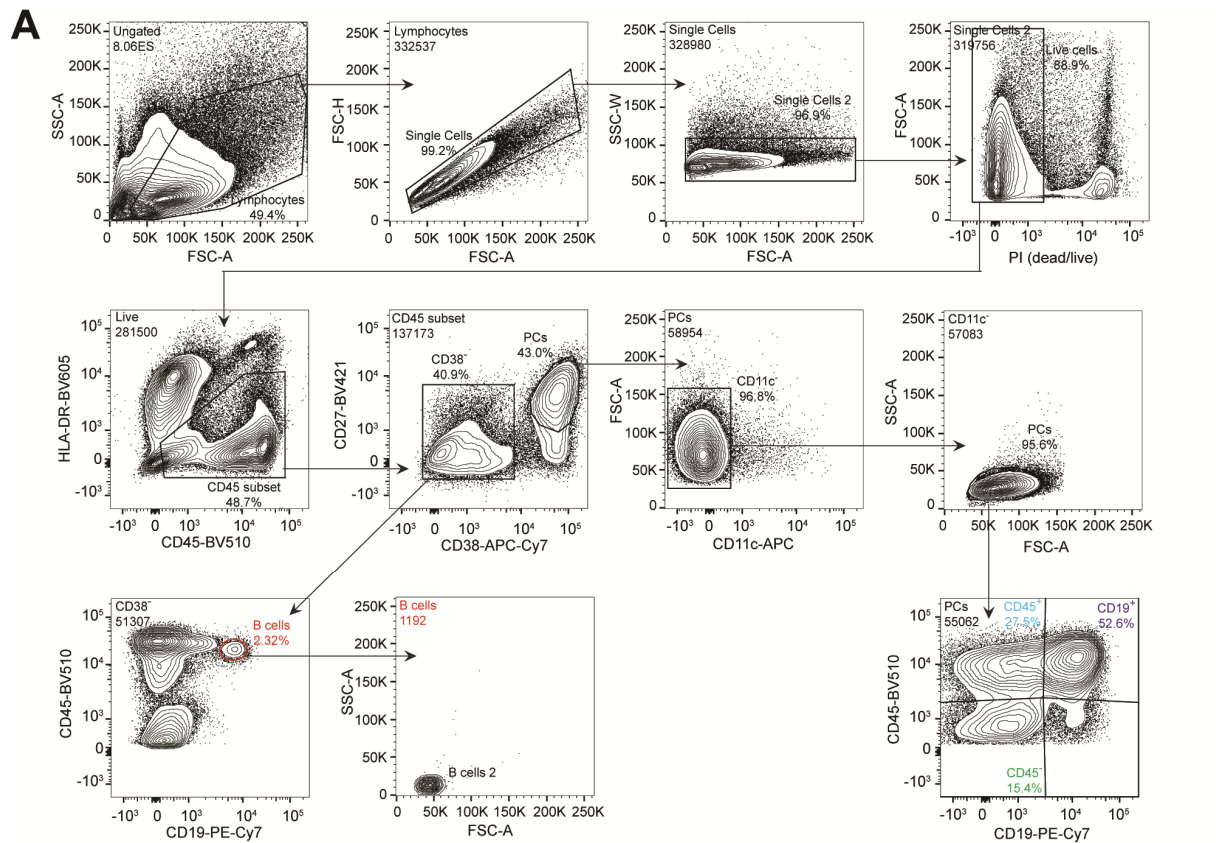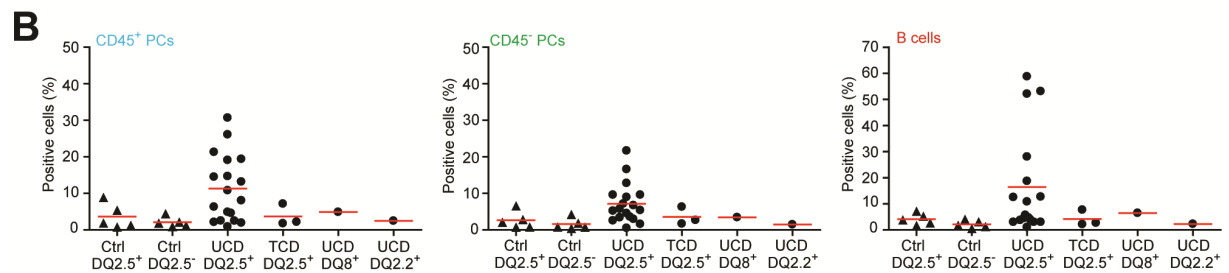

**Supplementary Figure 4.** Flow cytometric gating strategy and analysis of plasma cells and B cells presenting DQ2.5-glia- $\alpha$ 1a peptide. Single-cell suspensions were prepared from intestinal biopsies, cells were stained with the indicated antibodies and immediately analyzed by flow cytometry. (A) Representative gating strategy for detection of gluten peptide presentation is shown. FSC-A, FSC-H and SSC-W were used to gate out doublet cells. (B) Stratification of the control patients among the CD45<sup>+</sup> plasma cells, CD45<sup>-</sup> plasma cells and B cells from Fig. 4B. Ctrl HLA-DQ2.5<sup>+</sup> (n=5), Ctrl HLA-DQ2.5<sup>-</sup> (n=5), UCD HLA-DQ2.5<sup>+</sup> (n=18), TCD HLA-DQ2.5<sup>+</sup> (n=3), UCD HLA-DQ8<sup>+</sup> (n=1), and UCD HLA-DQ2.2<sup>+</sup> (n=1). mIgG2b mAb 106 or 107 were used for detection and percent positive cells was determined relative to use of secondary antibody alone. Each data point represents an individual subject; non-celiac ctrl patients did not have mucosal alterations; red bars indicate mean percentage. (A,B) PCs, plasma cells.

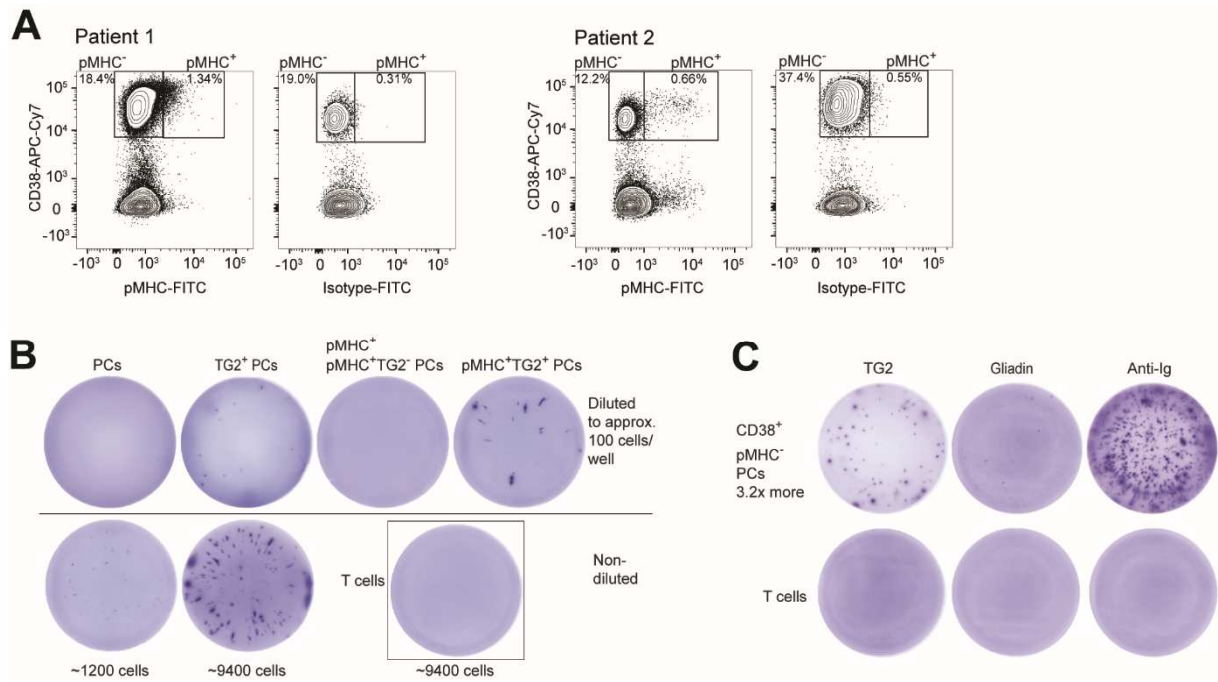

**Supplementary Figure 5.** FACS sorting of plasma cells for ELISPOT analyses. (A) pMHC<sup>+</sup> and pMHC<sup>-</sup> CD38<sup>+</sup> plasma cell populations (gated as large viable, CD38<sup>+</sup>, CD11c<sup>-</sup>, CD14<sup>-</sup>, CD4<sup>-</sup> cells) that were assessed for IgA and IgM expression in Fig. 5A. Notably, the two populations were FACS sorted and used for the TG2 and gliadin ELISPOT shown in Fig. 5C and panel C of this figure. (B) Representative TG2-specific ELISPOT using the sorted plasma cell subsets as indicated (n=3). TG2-specific IgA autoantibodies were captured onto TG2-coated plates and detected using AP-conjugated anti-IgA Ab. T cells were used as negative control. (C) TG2 and gliadin ELISPOT. Upper panel; CD38<sup>+</sup> pMHC<sup>-</sup> plasma cells were used in approximately 3.2x higher numbers than as shown in Fig. 5C, resulting in increased spot frequency and also visible gliadin spots in this group. Lower panel; T cells were used as negative control. Derived from the same ELISPOT experiment as shown in Fig. 5C. (B,C) PCs, plasma cells.

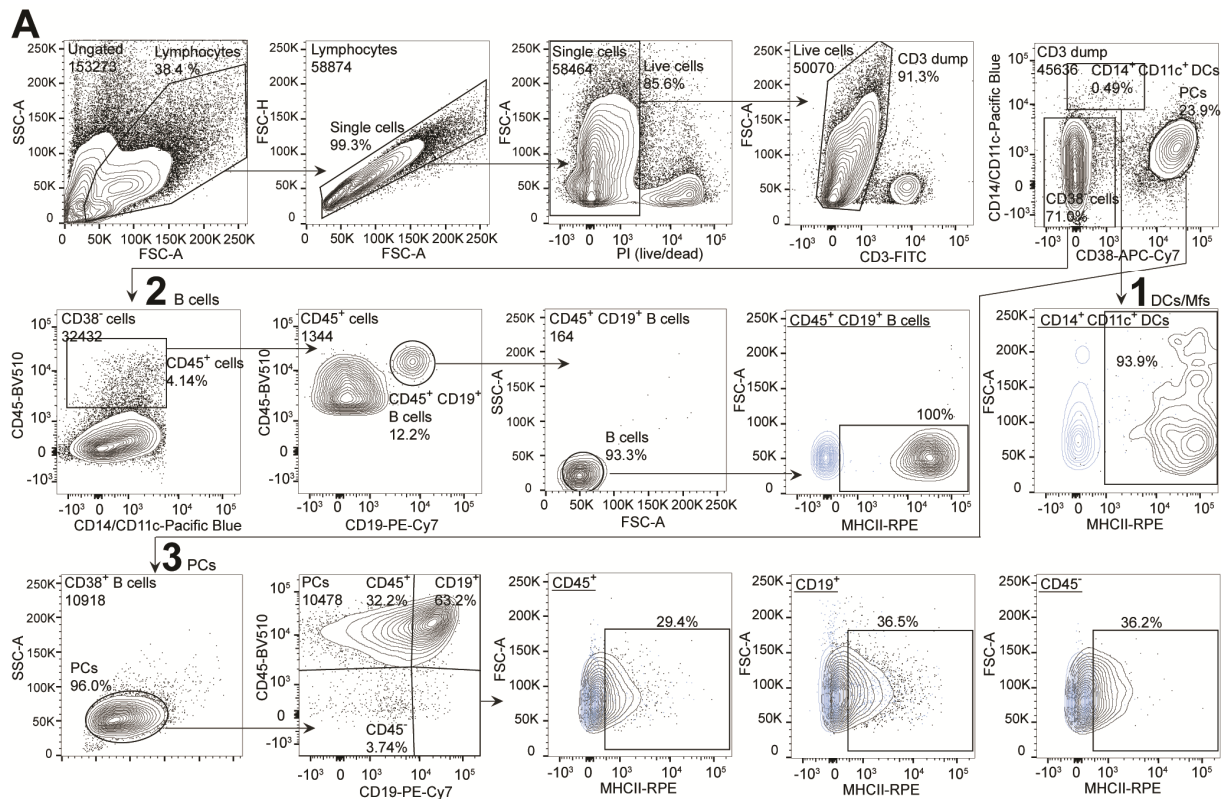

**Supplementary Figure 6.** (A) Gating strategy for detection of MHCII on APC subsets. Single-cell suspensions prepared from intestinal biopsies were stained with the indicated antibodies and immediately analyzed by flow cytometry. Representative gating strategy for detection of MHCII on bulk DCs and Mfs (1), B cells (2) and plasma cells (3) are shown. MHCII staining (black) is overlaid isotype control staining (blue). FSC-A and FSC-H were used to gate out doublet cells. PCs, plasma cells. (B) Percentage MHCII expression on bulk plasma cell subsets (large, viable, CD19<sup>+</sup>/CD45<sup>+</sup>/CD38<sup>+</sup>) stained with either a pan-MHCII mAb or an HLA-DQ2 mAb. Material was obtained from patients undergoing Whipple procedure and confirmed to have a normal intestinal histology (n=3). Each data point represents an individual subject.

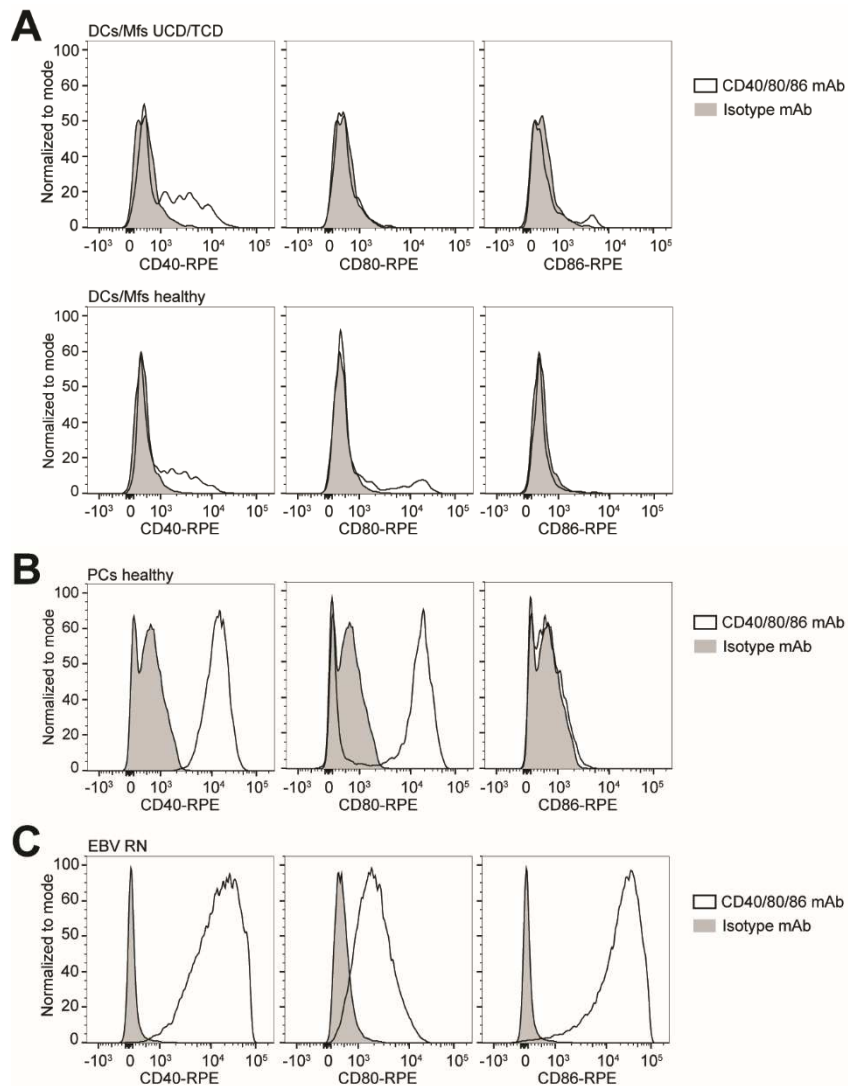

**Supplementary Figure 7.** (A,B) Representative staining for costimulatory markers CD40, CD80 and CD86. (A) Costimulatory marker expression profile on DCs/Mfs from UCD or TCD patients (n=4, 3 HLA-DQ2.5<sup>+</sup> UCD patients with Marsh 3A/B and 1 TCD patient with Marsh 0) and from healthy, non-inflamed gut samples (n=3, all confirmed non-inflamed duodenum). (B) Expression profile on plasma cells from the same healthy, non-inflamed gut samples as above. PCs, plasma cells. (C) Staining of the EBV-B cell line RN (CD114) was included as a positive control.

**Supplementary Table 1. Kinetics of the scFv-HLA-DQ2.5:DQ2.5-glia- $\alpha$ 1a interaction.**

| Clone    | Single cycle kinetics <sup>a</sup> |                        |                       |                       | Steady state <sup>b</sup> |                       |
|----------|------------------------------------|------------------------|-----------------------|-----------------------|---------------------------|-----------------------|
|          | $k_{on}$ ( $M^{-1}s^{-1}$ )        | $k_{off}$ ( $s^{-1}$ ) | $K_D$ (M)             | SE $K_D$ (M)          | $K_D$ (M)                 | SE $K_D$ (M)          |
| scFv 106 | $1.29 \times 10^5$                 | 0.01262                | $9.79 \times 10^{-8}$ | $5.63 \times 10^{-8}$ | $1.42 \times 10^{-7}$     | $2.20 \times 10^{-8}$ |
| scFv 107 | $2.89 \times 10^5$                 | 0.02151                | $7.43 \times 10^{-8}$ | $7.44 \times 10^{-8}$ | $6.70 \times 10^{-8}$     | $1.30 \times 10^{-8}$ |

<sup>a</sup> Kinetics were determined by fitting data to a 1:1 Langmuir binding model.

<sup>b</sup> Steady state  $K_D$  was derived from the single cycle kinetics runs.



**Supplementary Table 2. Recombinant pMHCs and soluble peptides.**

| <b>Recombinant pMHC</b>                          | <b>Peptide amino acids</b>              |
|--------------------------------------------------|-----------------------------------------|
| HLA-DQ2.5:DQ2.5-glia- $\alpha$ 1a <sup>a</sup>   | <u>QLQPFQPELPY</u>                      |
| HLA-DQ2.5:DQ2.5-glia- $\alpha$ 1a-Q              | <u>QLQPFQPQLPY</u>                      |
| HLA-DQ2.5:DQ2.5-glia- $\alpha$ 1a-pL7Q           | <u>QLQPFQPEQPY</u>                      |
| HLA-DQ2.5:DQ2.5-glia- $\alpha$ 1a-pY9F           | <u>QLQPFQPELPE</u>                      |
| HLA-DQ2.5:DQ2.5-glia- $\alpha$ 1a-S $\alpha$ 72I | <u>QLQPFQPELPY</u>                      |
| HLA-DQ2.5:DQ2.5-glia- $\alpha$ 2                 | <u>PQPELPYPQPE</u>                      |
| HLA-DQ2.5:DQ2.5-glia- $\omega$ 1                 | <u>QQPFQPEQFP</u>                       |
| HLA-DQ2.5:DQ2.5-glia- $\omega$ 2                 | <u>FPQPEQFPWQP</u>                      |
| HLA-DQ2.5:DQ2.5-glia- $\gamma$ 1                 | <u>PEQPQSFPEQERP</u>                    |
| HLA-DQ2.5:DQ2.5-glia- $\gamma$ 2                 | <u>QGIIQPEQPAQL</u>                     |
| HLA-DQ2.5:DQ2.5-glia- $\gamma$ 3                 | <u>TEQPEQPYPQP</u>                      |
| HLA-DQ2.5:DQ2.5-glia- $\gamma$ 4c                | <u>TEQPEQFPQP</u>                       |
| HLA-DQ2.5:CLIP2                                  | <u>MATPLLMQALPMGAL</u>                  |
| <b>Soluble peptides</b>                          | <b>Peptide amino acids</b>              |
| DQ2.5-glia- $\alpha$ 1a                          | <u>QLQPFQPELPY</u>                      |
| DQ2.5-glia- $\alpha$ 2                           | <u>PQPELPYPQQL</u>                      |
| 33mer                                            | <u>LQLQPFQPELPYPQPELPYPQPELPYPYPQPF</u> |

The 9mer core sequence constituting the T-cell epitope is underlined and all peptides are in their deamidated form unless otherwise specified (native=Q). Soluble, recombinant pMHCs were generated as previously described<sup>1</sup>

<sup>a</sup> Or HLA-DQ2.2.

**Supplementary Table 3. Antibodies used for ELISA.**

| <b>Antigen</b> | <b>Conjugate</b> | <b>Clone</b> | <b>Supplier</b>      | <b>Dilution</b> |
|----------------|------------------|--------------|----------------------|-----------------|
| NeutrAvidin    | -                | -            | Avidity              | 10 µg/ml        |
| M13            | HRP              | Monoclonal   | GE Healthcare        | 1:5000          |
| His-tag        | HRP              | AD1.1.10     | AbD Serotech         | 1:5000          |
| Human IgG Fc   | AP               | Polyclonal   | Sigma                | 1:2000          |
| HLA-DQ         | -                | 2.12.E11     | Diatech <sup>2</sup> | 1 µg/ml         |
| Mouse IgG Fc   | AP               | Polyclonal   | Sigma                | 1:2000          |

Normalized amounts of soluble, recombinant pMHC were captured onto the NeutrAvidin coated plates, before addition of phage/periplasmic fractions/0.5 µg/ml hIgG1. Samples were detected with anti-M13-HRP/anti-His-tag-HRP/anti-human IgG Fc-AP, respectively; mAb 2.12.E11 detected using anti-mouse IgG Fc-AP; 0.1 µg/ml hIgG1 was pre-incubated 30 min with non-biotinylated pMHC/peptides 2-fold diluted from 1 µM for competition assays (peptides specified in Supplementary Table 2). PBS supplemented with 4% (w/v) non-fat skim milk powder was used to block plates, and PBS supplemented with 0.05% (v/v) Tween-20 was used as buffer for dilution of samples and for washing the plates between each layer.

**Supplementary Table 4. Antibodies used for flow cytometry.**

| Antigen                                                                            | Conjugate    | Clone        | Supplier                 | Dilution |
|------------------------------------------------------------------------------------|--------------|--------------|--------------------------|----------|
| <b>Staining of A20 B cells and peptide-loaded monocyte-derived DCs<sup>c</sup></b> |              |              |                          |          |
| hlgG1 106/107                                                                      | -            | 106, 107     | In-house                 | 10 µg/ml |
| hlgG (F(ab') <sub>2</sub> ) <sup>a</sup>                                           | Biotin       | Polyclonal   | Southern Biotech         | 2 µg/ml  |
| HLA-DQ2 <sup>a</sup>                                                               | Biotin       | 2.12.E.11    | Diatech <sup>2</sup>     | 10 µg/ml |
| Isotype control                                                                    | Biotin       | 15H6         | Southern Biotech         | 10 µg/ml |
| <b>Staining of pMHC on DC, Mfs, plasma cells and B cells<sup>d</sup></b>           |              |              |                          |          |
| mIgG2b 106/107                                                                     | -            | 106, 107     | In-house                 | 10 µg/ml |
| Isotype control                                                                    | -            | NIP, MPC-11  | In-house, Sigma          | 10 µg/ml |
| mIgG2b                                                                             | FITC         | Polyclonal   | Southern Biotech         | 1 µg/ml  |
| CD3                                                                                | APC          | OKT3         | eBioscience              | 1:20     |
| CD11c                                                                              | APC          | S-HCl-3      | BD Biosciences           | 1:20     |
| CD14                                                                               | APC          | HCD14        | Biolegend                | 1:20     |
| CD14                                                                               | APC-Cy7      | HCD14        | Biolegend                | 1:20     |
| HLA-DR                                                                             | BV605        | L243         | Biolegend                | 1:20     |
| CD45                                                                               | BV510        | H130         | Biolegend                | 1:20     |
| CD19                                                                               | PE-Cy7       | HIB19        | Biolegend                | 1:20     |
| CD38                                                                               | APC-Cy7      | HIT2         | Biolegend                | 1:20     |
| CD27                                                                               | BV421        | O323         | Biolegend                | 1:20     |
| <b>Staining of MHCII on DC, Mfs, plasma cells and B cells<sup>d</sup></b>          |              |              |                          |          |
| HLA-DP/DR/DQ/Dx                                                                    | -            | CR3/43       | Santa Cruz Biotechnology | 10 µg/ml |
| Isotype ctrl.                                                                      | -            | MOPC-21      | BD Pharmingen            | 10 µg/ml |
| mIgG1                                                                              | PE           | A85-1        | BD Biosciences           | 1 µg/ml  |
| HLA-DQ                                                                             | -            | SPV-L3       | Diatech                  | 10 µg/ml |
| Isotype ctrl.                                                                      | -            | HOPC-1       | Southern Biotech         | 10 µg/ml |
| mIgG2a                                                                             | PE           | RMG2a-62     | Biolegend                | 1 µg/ml  |
| CD3                                                                                | FITC         | OKT3         | Biolegend                | 1:50     |
| CD11c                                                                              | BV450        | B-Ly6        | BD Horizon               | 1:20     |
| CD14                                                                               | Pacific Blue | M5E2         | BD Pharmingen            | 1:20     |
| CD45                                                                               | BV510        | H130         | Biolegend                | 1:20     |
| CD19                                                                               | PE-Cy7       | HIB19        | Biolegend                | 1:20     |
| CD38                                                                               | APC-Cy7      | HIT2         | Biolegend                | 1:20     |
| TG2 multimers <sup>b</sup>                                                         | APC          | -            | In-house                 |          |
| <b>Staining of co-stimulatory molecules<sup>d</sup></b>                            |              |              |                          |          |
| CD3                                                                                | FITC         | OKT3         | Biolegend                | 1:50     |
| CD11c                                                                              | APC          | S-HCl-3      | BD Biosciences           | 1:20     |
| CD14                                                                               | APC          | HCD14        | Biolegend                | 1:20     |
| CD45                                                                               | BV510        | H130         | Biolegend                | 1:20     |
| CD19                                                                               | PE-Cy7       | HIB19        | Biolegend                | 1:20     |
| CD38                                                                               | APC-Cy7      | HIT2         | Biolegend                | 1:20     |
| CD27                                                                               | BV421        | O323         | Biolegend                | 1:20     |
| CD40                                                                               | PE           | HI40a        | ImmunoTools              | 1:20     |
| CD80                                                                               | PE           | MEM-233      | SeroTech                 | 1:20     |
| CD86                                                                               | PE           | 2331 (FUN-1) | BD Pharmingen            | 1:20     |
| Isotype ctrl.                                                                      | PE           | P3.6.2.8.1   | eBioscience              | 1:20     |

1x PBS supplemented with 5% FCS and 0.1% NaN<sub>3</sub> was used as staining buffer and all stainings were performed on ice and with centrifugations at 4°C.

<sup>a</sup> Detected with streptavidin RPE (Invitrogen).

<sup>b</sup> Prepared by preincubation of biotinylated TG2 with Strep-tactin-APC (iba solutions) as described<sup>3</sup>.

<sup>c</sup> Dead cells were excluded using 7-AAD and samples were immediate analysis on FACSCalibur (BD).

<sup>d</sup> Propidium iodide exclusion of dead cells and human FcR Blocking Reagent (Miltenyi Biotec) was included. Cells were immediately acquired on LSR Fortessa cytometer (BD).

**Supplementary Table 5. Antibodies used for FACS sorting.**

| Antigen                                 | Conjugate    | Clone      | Supplier              | Dilution |
|-----------------------------------------|--------------|------------|-----------------------|----------|
| <b>Sorting of plasma cells, panel 1</b> |              |            |                       |          |
| hlgG1 106                               | Alexa-488    | 106        | In-house              | 10 µg/ml |
| hlgG1 RSV                               | Alexa-488    | RSV        | In-house              | 10 µg/ml |
| CD4                                     | Pacific Blue | SK3        | Biolegend             | 1:33     |
| CD8                                     | Pacific Blue | SK1        | Biolegend             | 1:33     |
| CD14                                    | Pacific Blue | M5E2       | Biolegend             | 1:33     |
| CD11c                                   | BV450        | B-Ly6      | BD Horizon            | 1:33     |
| CD27                                    | PE-Cy7       | LG.7F9     | eBioscience           | 1:500    |
| IgA                                     | PE           | Polyclonal | Southern Biotech      | 1:2000   |
| TG2 multimers <sup>a</sup>              | APC          | -          | In-house              |          |
| <b>Sorting of plasma cells, panel 2</b> |              |            |                       |          |
| mIgG2b 107                              | -            | 107        | In-house              | 10 µg/ml |
| Isotype control                         | -            | NIP, OMV   | In-house <sup>4</sup> | 10 µg/ml |
| mIgG2b                                  | FITC         | Polyclonal | Southern Biotech      | 1 µg/ml  |
| CD4                                     | Pacific Blue | SK3        | Biolegend             | 1:20     |
| CD14                                    | Pacific Blue | M5E2       | Biolegend             | 1:20     |
| CD11c                                   | BV450        | B-Ly6      | BD Horizon            | 1:20     |
| CD38                                    | APC-Cy7      | HIT2       | Biolegend             | 1:20     |
| IgA                                     | APC          | REA1014    | MACS                  | 1:20     |
| IgM                                     | PE           | SA-DA4     | eBioscience           | 1:20     |

1x PBS supplemented with 5% FCS and 0.1% NaN<sub>3</sub> was used as staining buffer and all stainings were performed on ice and with centrifugations at 4°C. Samples were sorted on FACSAriaII (BD) with a 100 µM nozzle.

<sup>a</sup> Prepared by preincubation of biotinylated TG2 with Strep-tactin-APC (iba solutions) as described<sup>3</sup>.

## References

1. Quarsten H, McAdam SN, Jensen T, et al. Staining of celiac disease-relevant T cells by peptide-DQ2 multimers. *J Immunol* 2001;167:4861-8.
2. Viken HD, Paulsen G, Sollid LM, et al. Characterization of an HLA-DQ2-specific monoclonal antibody. Influence of amino acid substitutions in DQ beta 1\*0202. *Hum Immunol* 1995;42:319-27.
3. Snir O, Mesin L, Gidoni M, et al. Analysis of celiac disease autoreactive gut plasma cells and their corresponding memory compartment in peripheral blood using high-throughput sequencing. *J Immunol* 2015;194:5703-12.
4. Høydahl LS, Nilssen NR, Gunnarsen KS, et al. Multivalent pIX phage display selects for distinct and improved antibody properties. *Sci Rep* 2016;6:39066.
